# Supplementary material for: Identification and Validation of Invasion-Related Molecular Subtypes and Prognostic Features for Cervical Cancer
Source: Hindawi journal article supplement (doi:10.1155/2022/1902289), 2022-03-18
Supplement: f4 [file 1902289.f4.pdf]

Supplementary Table1: List of invasion related genes

---

Invasion related genes

---

AEBP1  
AKR1B1  
AMD1  
SLC25A5  
ATP5PB  
BAG1  
BGN  
C1QB  
CALD1  
CAPG  
CCNE1  
CDH11  
CKS1B  
CKS2  
COL1A1  
COL1A2  
COL3A1  
COL5A1  
COL5A2  
COL6A2  
COL6A3  
COL10A1  
COL11A1  
COMP  
CSE1L  
VCAN  
CTSK  
DAB2  
DDX5  
EDNRA  
FAP  
FBN1  
FN1  
GNAS  
H2AFZ  
HMGB2  
HNRNPU  
HSD17B4  
CCN1  
INHBA  
LAMB1  
LAMC1

---

---

LGALS1  
LOX  
LOXL2  
LUM  
MMP2  
MMP11  
HNRNPM  
NDUFB7  
YBX1  
PDGFRB  
PLAU  
PRRX1  
PNN  
PPIC  
PROS1  
PSMA2  
PSMB4  
RGS4  
SNAI2  
SPOCK1  
TGFB1  
THBS2  
THY1  
TNFAIP6  
UBE2V2  
ADAM12  
MFAP5  
ITGBL1  
TP53I3  
NUAK1  
HNRNPDL  
TXNDC9  
LRRC17  
IFI30  
POSTN  
CBX1  
NID2  
RRAS2  
RALY  
SEPHS2  
HEY1  
MXRA5  
OLFML2B  
TMEM158

---

---

WWTR1  
GREM1  
NOX4  
CLEC4A  
COPZ2  
ASPN  
CEMIP  
CRISPLD2  
TUBB6  
LRRC15  
TUBB

---
