# Supplementary material for: Identification and Validation of Invasion-Related Molecular Subtypes and Prognostic Features for Cervical Cancer
Source: Hindawi journal article supplement (doi:10.1155/2022/1902289), 2022-03-18
Supplement: f5 [file 1902289.f5.pdf]

Supplementary Table2: Molecular subtype information of each sample in TCGA Dataset

| Sample          | Cluster |
|-----------------|---------|
| TCGA-FU-A770-01 | C1      |
| TCGA-C5-A1BI-01 | C1      |
| TCGA-C5-A8XI-01 | C1      |
| TCGA-VS-A8EI-01 | C1      |
| TCGA-FU-A3WB-01 | C1      |
| TCGA-JW-A69B-01 | C1      |
| TCGA-VS-A8EL-01 | C1      |
| TCGA-EK-A2PK-01 | C1      |
| TCGA-FU-A3TX-01 | C1      |
| TCGA-MA-AA3X-01 | C1      |
| TCGA-EA-A3QD-01 | C1      |
| TCGA-VS-A9V5-01 | C1      |
| TCGA-C5-A8YQ-01 | C1      |
| TCGA-FU-A3NI-01 | C1      |
| TCGA-LP-A4AX-01 | C1      |
| TCGA-VS-A8QM-01 | C1      |
| TCGA-VS-A8EB-01 | C1      |
| TCGA-C5-A7X5-01 | C1      |
| TCGA-Q1-A73O-01 | C1      |
| TCGA-BI-A0VR-01 | C1      |
| TCGA-EA-A5ZD-01 | C1      |
| TCGA-VS-A954-01 | C1      |
| TCGA-HM-A4S6-01 | C1      |
| TCGA-EK-A2RJ-01 | C1      |
| TCGA-C5-A3HL-01 | C1      |
| TCGA-C5-A8XK-01 | C1      |
| TCGA-Q1-A6DT-01 | C1      |
| TCGA-EA-A5ZE-01 | C1      |
| TCGA-C5-A907-01 | C1      |
| TCGA-EA-A3HS-01 | C1      |
| TCGA-VS-A9UR-01 | C1      |
| TCGA-VS-A959-01 | C1      |
| TCGA-Q1-A73S-01 | C1      |
| TCGA-PN-A8MA-01 | C1      |
| TCGA-EK-A2R9-01 | C1      |
| TCGA-C5-A7XC-01 | C1      |
| TCGA-EA-A78R-01 | C1      |
| TCGA-VS-A9UH-01 | C1      |
| TCGA-Q1-A6DW-01 | C1      |
| TCGA-FU-A3HY-01 | C1      |
| TCGA-C5-A1BJ-01 | C1      |
| TCGA-DS-A1OA-01 | C1      |

---

|                 |    |
|-----------------|----|
| TCGA-ZJ-AAXA-01 | C1 |
| TCGA-WL-A834-01 | C1 |
| TCGA-VS-A9UP-01 | C1 |
| TCGA-VS-A9U6-01 | C1 |
| TCGA-C5-A1MI-01 | C1 |
| TCGA-MY-A913-01 | C1 |
| TCGA-VS-A9UQ-01 | C1 |
| TCGA-MA-AA3Y-01 | C1 |
| TCGA-GH-A9DA-01 | C1 |
| TCGA-FU-A3HZ-01 | C1 |
| TCGA-EK-A2RC-01 | C1 |
| TCGA-EA-A3HQ-01 | C1 |
| TCGA-DS-A0VK-01 | C1 |
| TCGA-C5-A1M9-01 | C1 |
| TCGA-C5-A3HF-01 | C1 |
| TCGA-ZX-AA5X-01 | C1 |
| TCGA-VS-AA62-01 | C1 |
| TCGA-VS-A9V4-01 | C1 |
| TCGA-VS-A9V0-01 | C1 |
| TCGA-VS-A9UM-01 | C1 |
| TCGA-VS-A9UL-01 | C1 |
| TCGA-VS-A9UJ-01 | C1 |
| TCGA-VS-A950-01 | C1 |
| TCGA-VS-A94Y-01 | C1 |
| TCGA-VS-A8QC-01 | C1 |
| TCGA-UC-A7PG-01 | C1 |
| TCGA-UC-A7PD-01 | C1 |
| TCGA-Q1-A73R-01 | C1 |
| TCGA-MU-A8JM-01 | C1 |
| TCGA-MU-A5YI-01 | C1 |
| TCGA-MA-AA43-01 | C1 |
| TCGA-LP-A4AW-01 | C1 |
| TCGA-LP-A4AU-01 | C1 |
| TCGA-JX-A3PZ-01 | C1 |
| TCGA-JW-A5VI-01 | C1 |
| TCGA-JW-A5VH-01 | C1 |
| TCGA-IR-A3LH-01 | C1 |
| TCGA-IR-A3LB-01 | C1 |
| TCGA-HM-A3JK-01 | C1 |
| TCGA-HM-A3JJ-01 | C1 |
| TCGA-HG-A2PA-01 | C1 |
| TCGA-FU-A57G-01 | C1 |
| TCGA-FU-A3YQ-01 | C1 |
| TCGA-FU-A3TQ-01 | C1 |

---

---

|                 |    |
|-----------------|----|
| TCGA-EX-A3L1-01 | C1 |
| TCGA-EK-A2RO-01 | C1 |
| TCGA-EK-A2RM-01 | C1 |
| TCGA-EK-A2RE-01 | C1 |
| TCGA-EK-A2R8-01 | C1 |
| TCGA-EK-A2PM-01 | C1 |
| TCGA-EK-A2PI-01 | C1 |
| TCGA-EK-A2H1-01 | C1 |
| TCGA-EA-A97N-01 | C1 |
| TCGA-EA-A5ZF-01 | C1 |
| TCGA-EA-A556-01 | C1 |
| TCGA-EA-A50E-01 | C1 |
| TCGA-EA-A4BA-01 | C1 |
| TCGA-EA-A439-01 | C1 |
| TCGA-EA-A411-01 | C1 |
| TCGA-EA-A410-01 | C1 |
| TCGA-EA-A3HT-01 | C1 |
| TCGA-EA-A1QS-01 | C1 |
| TCGA-DS-A7WH-01 | C1 |
| TCGA-DS-A7WF-01 | C1 |
| TCGA-DS-A3LQ-01 | C1 |
| TCGA-DS-A1O9-01 | C1 |
| TCGA-DS-A0VN-01 | C1 |
| TCGA-DS-A0VM-01 | C1 |
| TCGA-DG-A2KL-01 | C1 |
| TCGA-C5-A901-01 | C1 |
| TCGA-C5-A8ZZ-01 | C1 |
| TCGA-C5-A8YT-01 | C1 |
| TCGA-C5-A8YR-01 | C1 |
| TCGA-C5-A8XJ-01 | C1 |
| TCGA-C5-A7X8-01 | C1 |
| TCGA-C5-A7X3-01 | C1 |
| TCGA-C5-A7UH-01 | C1 |
| TCGA-C5-A7UC-01 | C1 |
| TCGA-C5-A7CM-01 | C1 |
| TCGA-C5-A7CL-01 | C1 |
| TCGA-C5-A7CK-01 | C1 |
| TCGA-C5-A7CJ-01 | C1 |
| TCGA-C5-A7CH-01 | C1 |
| TCGA-C5-A2LV-01 | C1 |
| TCGA-C5-A2LT-01 | C1 |
| TCGA-C5-A1MP-01 | C1 |
| TCGA-C5-A1MN-01 | C1 |
| TCGA-C5-A1MK-01 | C1 |

---

---

|                 |    |
|-----------------|----|
| TCGA-C5-A1MJ-01 | C1 |
| TCGA-C5-A1M6-01 | C1 |
| TCGA-C5-A1BN-01 | C1 |
| TCGA-C5-A1BF-01 | C1 |
| TCGA-C5-A0TN-01 | C1 |
| TCGA-4J-AA1J-01 | C1 |
| TCGA-BI-A0VS-01 | C1 |
| TCGA-VS-A8QH-01 | C2 |
| TCGA-EK-A2IP-01 | C2 |
| TCGA-C5-A1BE-01 | C2 |
| TCGA-C5-A1MH-01 | C2 |
| TCGA-EA-A3Y4-01 | C2 |
| TCGA-JW-A5VG-01 | C2 |
| TCGA-HM-A6W2-01 | C2 |
| TCGA-C5-A1M7-01 | C2 |
| TCGA-DS-A1OD-01 | C2 |
| TCGA-UC-A7PF-01 | C2 |
| TCGA-MU-A51Y-01 | C2 |
| TCGA-C5-A2M2-01 | C2 |
| TCGA-EK-A2GZ-01 | C2 |
| TCGA-IR-A3LA-01 | C2 |
| TCGA-VS-A9UY-01 | C2 |
| TCGA-Q1-A73Q-01 | C2 |
| TCGA-VS-A9UT-01 | C2 |
| TCGA-C5-A1M5-01 | C2 |
| TCGA-VS-A8QF-01 | C2 |
| TCGA-EA-A43B-01 | C2 |
| TCGA-2W-A8YY-01 | C2 |
| TCGA-VS-A9U7-01 | C2 |
| TCGA-ZJ-AAX4-01 | C2 |
| TCGA-VS-A94Z-01 | C2 |
| TCGA-VS-A94X-01 | C2 |
| TCGA-FU-A5XV-01 | C2 |
| TCGA-EK-A2IR-01 | C2 |
| TCGA-EX-A8YF-01 | C2 |
| TCGA-ZJ-A8QR-01 | C2 |
| TCGA-C5-A1ML-01 | C2 |
| TCGA-C5-A2LX-01 | C2 |
| TCGA-ZJ-AAXU-01 | C2 |
| TCGA-ZJ-A8QQ-01 | C2 |
| TCGA-XS-A8TJ-01 | C2 |
| TCGA-VS-A9V3-01 | C2 |
| TCGA-VS-A9V2-01 | C2 |
| TCGA-VS-A9V1-01 | C2 |

---

---

|                 |    |
|-----------------|----|
| TCGA-VS-A9UZ-01 | C2 |
| TCGA-VS-A9UV-01 | C2 |
| TCGA-VS-A9UU-01 | C2 |
| TCGA-VS-A9UO-01 | C2 |
| TCGA-VS-A9UI-01 | C2 |
| TCGA-VS-A9UD-01 | C2 |
| TCGA-VS-A9UC-01 | C2 |
| TCGA-VS-A9UB-01 | C2 |
| TCGA-VS-A9U5-01 | C2 |
| TCGA-VS-A958-01 | C2 |
| TCGA-VS-A957-01 | C2 |
| TCGA-VS-A953-01 | C2 |
| TCGA-VS-A952-01 | C2 |
| TCGA-VS-A94W-01 | C2 |
| TCGA-VS-A8QA-01 | C2 |
| TCGA-VS-A8Q9-01 | C2 |
| TCGA-VS-A8Q8-01 | C2 |
| TCGA-VS-A8EK-01 | C2 |
| TCGA-VS-A8EJ-01 | C2 |
| TCGA-VS-A8EH-01 | C2 |
| TCGA-VS-A8EG-01 | C2 |
| TCGA-VS-A8EC-01 | C2 |
| TCGA-UC-A7PI-01 | C2 |
| TCGA-RA-A741-01 | C2 |
| TCGA-R2-A69V-01 | C2 |
| TCGA-Q1-A73P-01 | C2 |
| TCGA-Q1-A6DV-01 | C2 |
| TCGA-Q1-A5R3-01 | C2 |
| TCGA-Q1-A5R2-01 | C2 |
| TCGA-Q1-A5R1-01 | C2 |
| TCGA-MY-A5BF-01 | C2 |
| TCGA-MY-A5BE-01 | C2 |
| TCGA-MY-A5BD-01 | C2 |
| TCGA-MA-AA42-01 | C2 |
| TCGA-MA-AA41-01 | C2 |
| TCGA-MA-AA3Z-01 | C2 |
| TCGA-MA-AA3W-01 | C2 |
| TCGA-LP-A7HU-01 | C2 |
| TCGA-LP-A5U3-01 | C2 |
| TCGA-LP-A5U2-01 | C2 |
| TCGA-JX-A5QV-01 | C2 |
| TCGA-JX-A3Q8-01 | C2 |
| TCGA-JX-A3Q0-01 | C2 |
| TCGA-JW-AAVH-01 | C2 |

---

---

|                 |    |
|-----------------|----|
| TCGA-JW-A852-01 | C2 |
| TCGA-JW-A5VL-01 | C2 |
| TCGA-JW-A5VK-01 | C2 |
| TCGA-JW-A5VJ-01 | C2 |
| TCGA-IR-A3LL-01 | C2 |
| TCGA-IR-A3LK-01 | C2 |
| TCGA-IR-A3LI-01 | C2 |
| TCGA-IR-A3LF-01 | C2 |
| TCGA-IR-A3LC-01 | C2 |
| TCGA-IR-A3L7-01 | C2 |
| TCGA-FU-A40J-01 | C2 |
| TCGA-FU-A3EO-01 | C2 |
| TCGA-FU-A2QG-01 | C2 |
| TCGA-FU-A23L-01 | C2 |
| TCGA-FU-A23K-01 | C2 |
| TCGA-EX-A69M-01 | C2 |
| TCGA-EX-A69L-01 | C2 |
| TCGA-EX-A449-01 | C2 |
| TCGA-EX-A1H6-01 | C2 |
| TCGA-EX-A1H5-01 | C2 |
| TCGA-EK-A3GN-01 | C2 |
| TCGA-EK-A3GK-01 | C2 |
| TCGA-EK-A3GJ-01 | C2 |
| TCGA-EK-A2RN-01 | C2 |
| TCGA-EK-A2RL-01 | C2 |
| TCGA-EK-A2RK-01 | C2 |
| TCGA-EK-A2RB-01 | C2 |
| TCGA-EK-A2RA-01 | C2 |
| TCGA-EK-A2R7-01 | C2 |
| TCGA-EK-A2PL-01 | C2 |
| TCGA-EK-A2PG-01 | C2 |
| TCGA-EK-A2H0-01 | C2 |
| TCGA-EA-A6QX-01 | C2 |
| TCGA-EA-A5O9-01 | C2 |
| TCGA-EA-A5FO-01 | C2 |
| TCGA-EA-A44S-01 | C2 |
| TCGA-EA-A3QE-01 | C2 |
| TCGA-EA-A3HU-01 | C2 |
| TCGA-EA-A3HR-01 | C2 |
| TCGA-EA-A1QT-01 | C2 |
| TCGA-DS-A7WI-01 | C2 |
| TCGA-DS-A5RQ-01 | C2 |
| TCGA-DS-A1OC-01 | C2 |
| TCGA-DS-A1OB-01 | C2 |

---

---

|                 |    |
|-----------------|----|
| TCGA-DS-A0VL-01 | C2 |
| TCGA-DR-A0ZM-01 | C2 |
| TCGA-DR-A0ZL-01 | C2 |
| TCGA-DG-A2KM-01 | C2 |
| TCGA-DG-A2KK-01 | C2 |
| TCGA-DG-A2KJ-01 | C2 |
| TCGA-DG-A2KH-01 | C2 |
| TCGA-C5-A905-01 | C2 |
| TCGA-C5-A902-01 | C2 |
| TCGA-C5-A8XH-01 | C2 |
| TCGA-C5-A7UI-01 | C2 |
| TCGA-C5-A7UE-01 | C2 |
| TCGA-C5-A7CO-01 | C2 |
| TCGA-C5-A7CG-01 | C2 |
| TCGA-C5-A3HE-01 | C2 |
| TCGA-C5-A3HD-01 | C2 |
| TCGA-C5-A2M1-01 | C2 |
| TCGA-C5-A2LZ-01 | C2 |
| TCGA-C5-A2LY-01 | C2 |
| TCGA-C5-A2LS-01 | C2 |
| TCGA-C5-A1MQ-01 | C2 |
| TCGA-C5-A1MF-01 | C2 |
| TCGA-C5-A1ME-01 | C2 |
| TCGA-C5-A1M8-01 | C2 |
| TCGA-C5-A1BQ-01 | C2 |
| TCGA-C5-A1BM-01 | C2 |
| TCGA-C5-A1BL-01 | C2 |
| TCGA-BI-A20A-01 | C2 |
| TCGA-C5-A1BK-01 | C2 |

---
