# Supplementary figures and images for: Identification and Validation of Invasion-Related Molecular Subtypes and Prognostic Features for Cervical Cancer
Source: Hindawi journal article supplement (doi:10.1155/2022/1902289), 2022-03-18

A

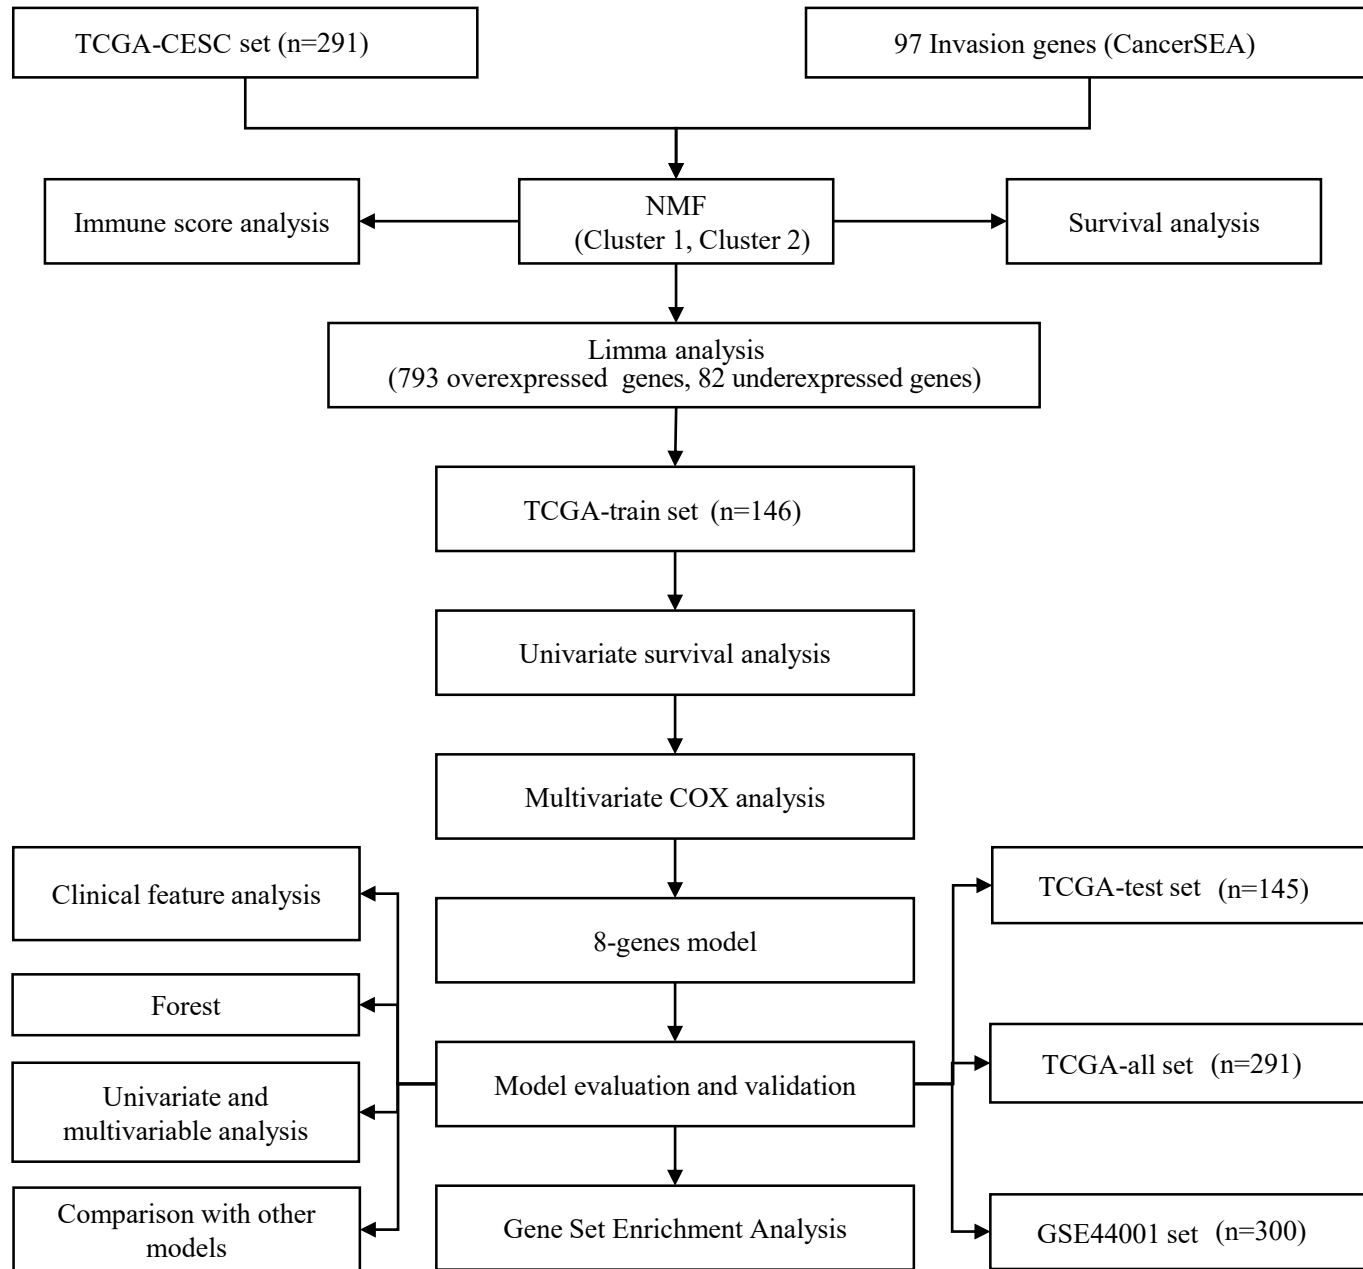

B

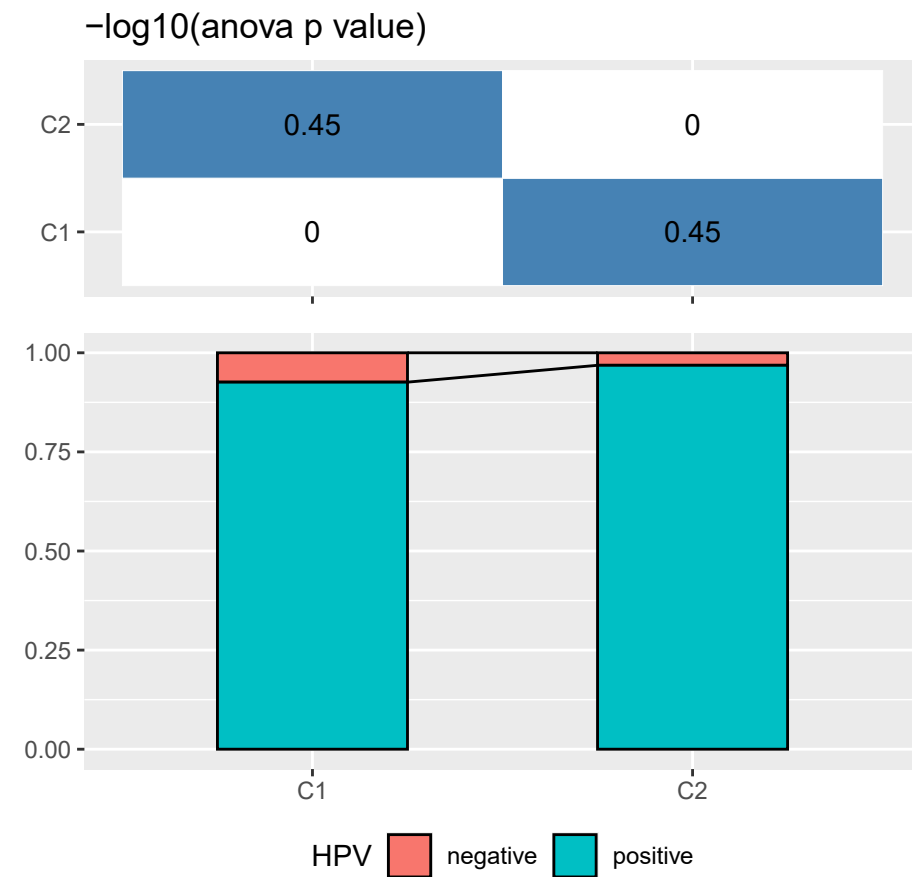

Supplement: f1 [file 1902289.f1.pdf]

ALG1L

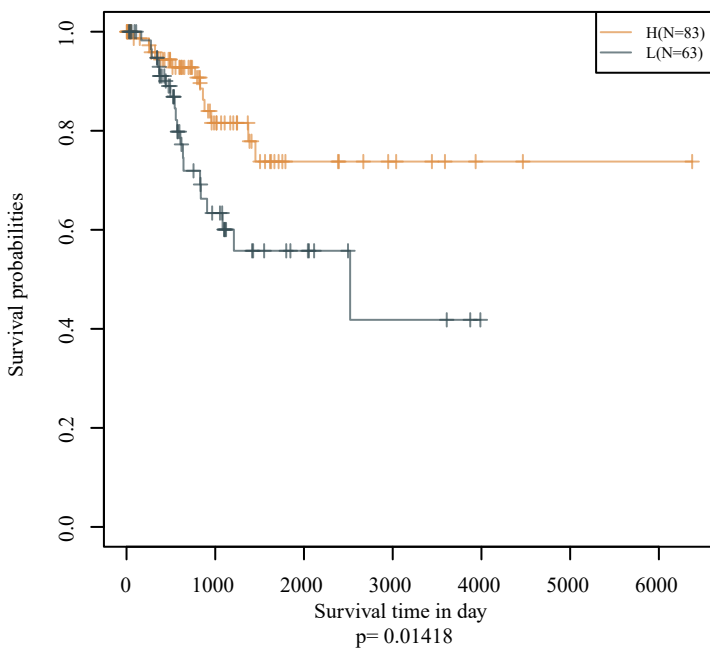

ARMCX1

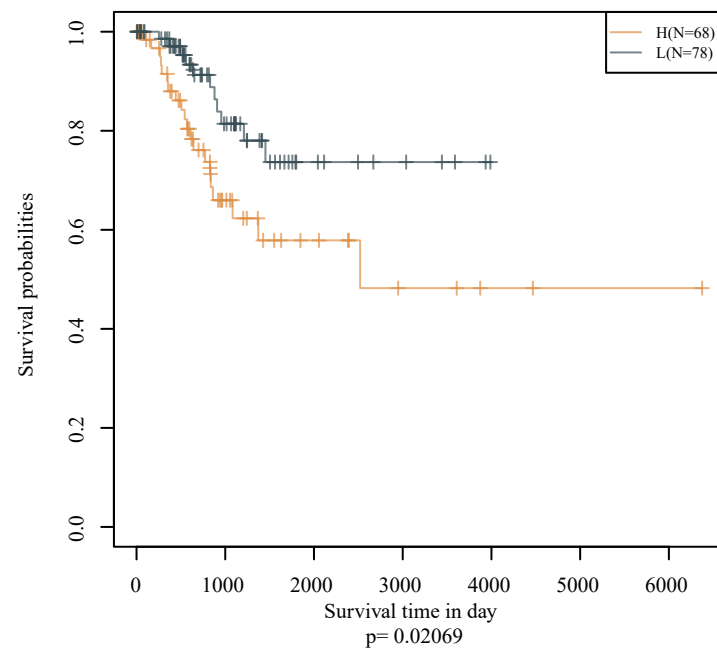

ASCL2

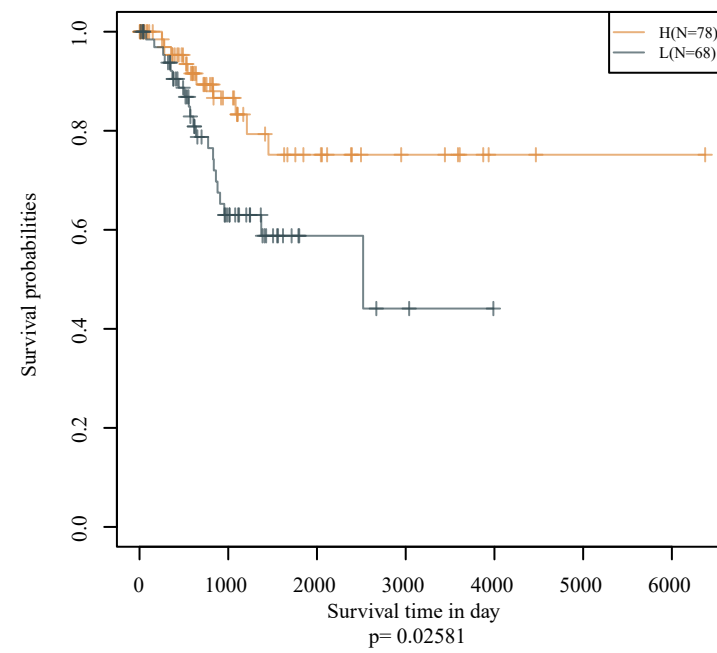

CST6

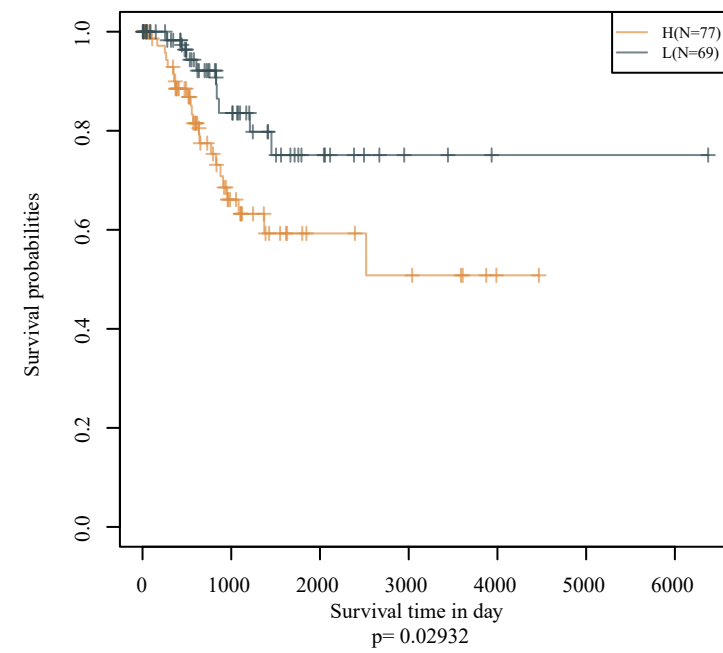

CXCL2

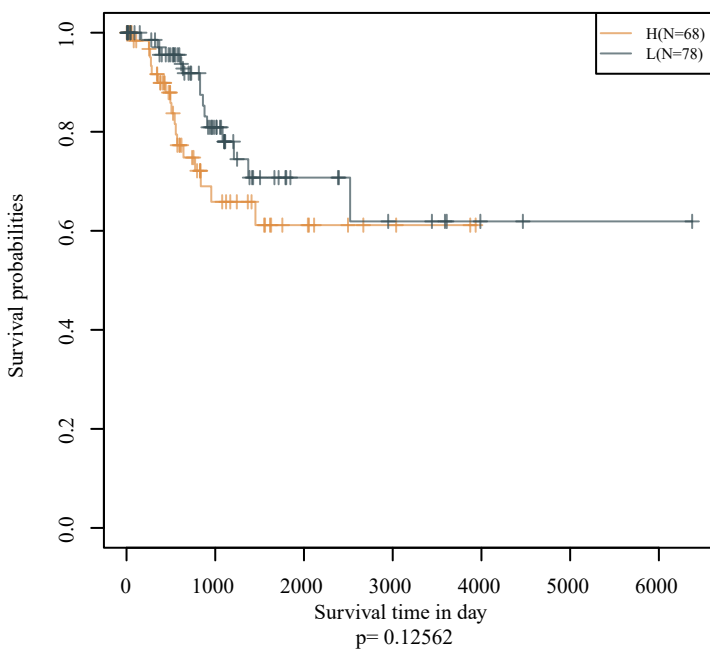

DES

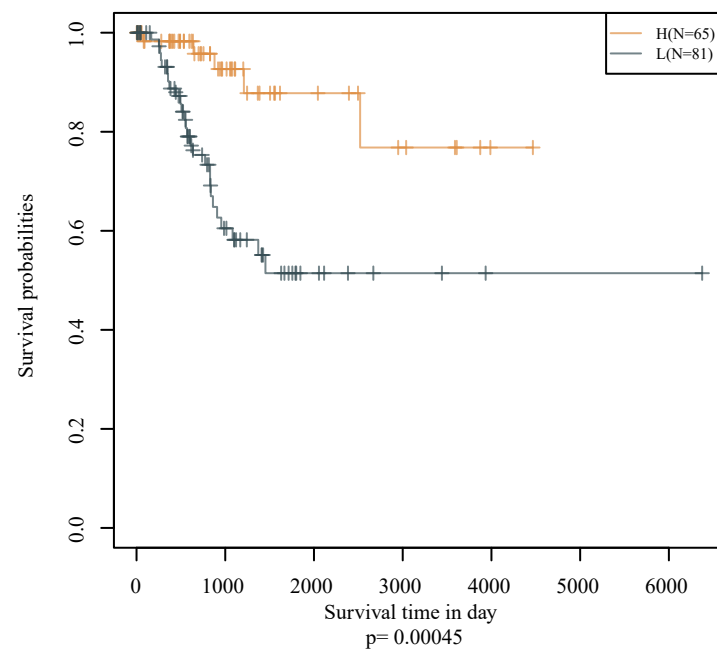

OPN3

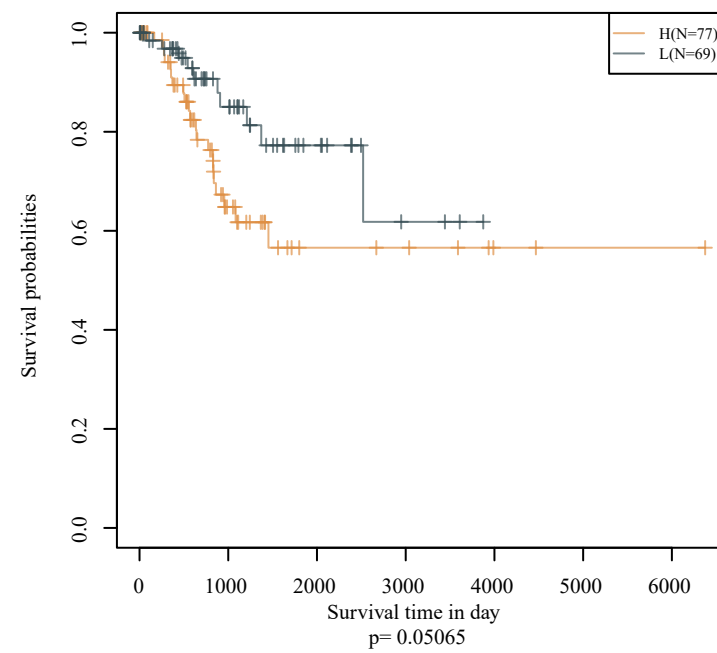

SERPINF1

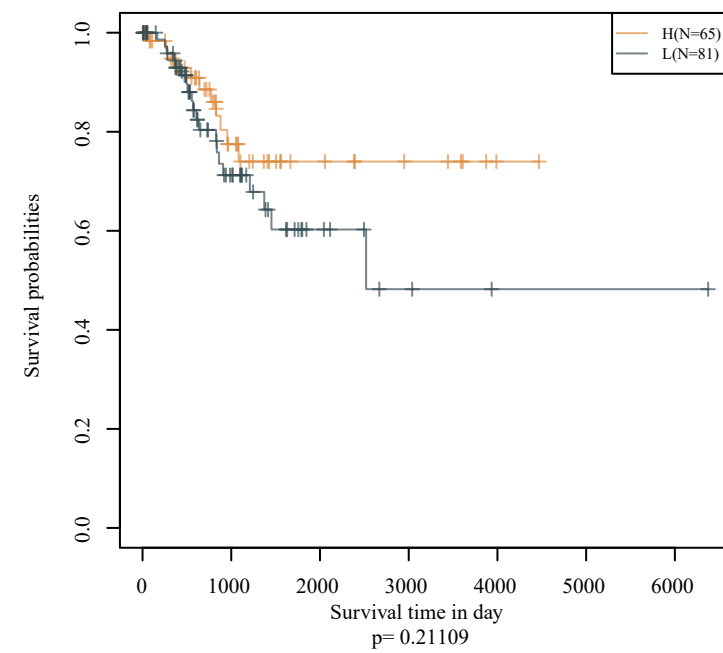

Supplement: f2 [file 1902289.f2.pdf]

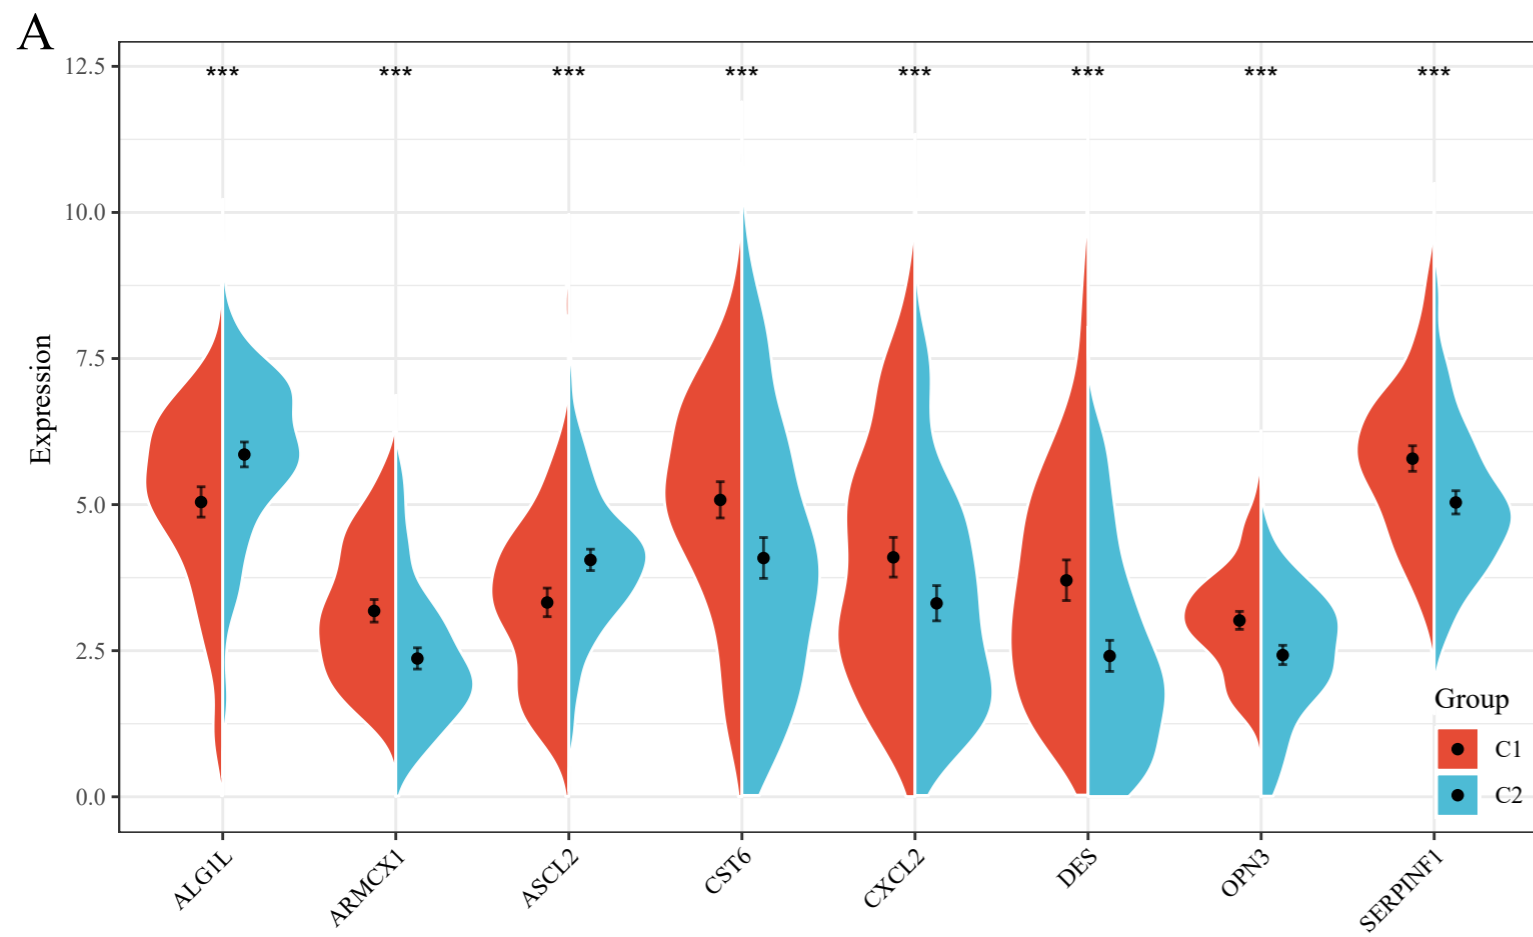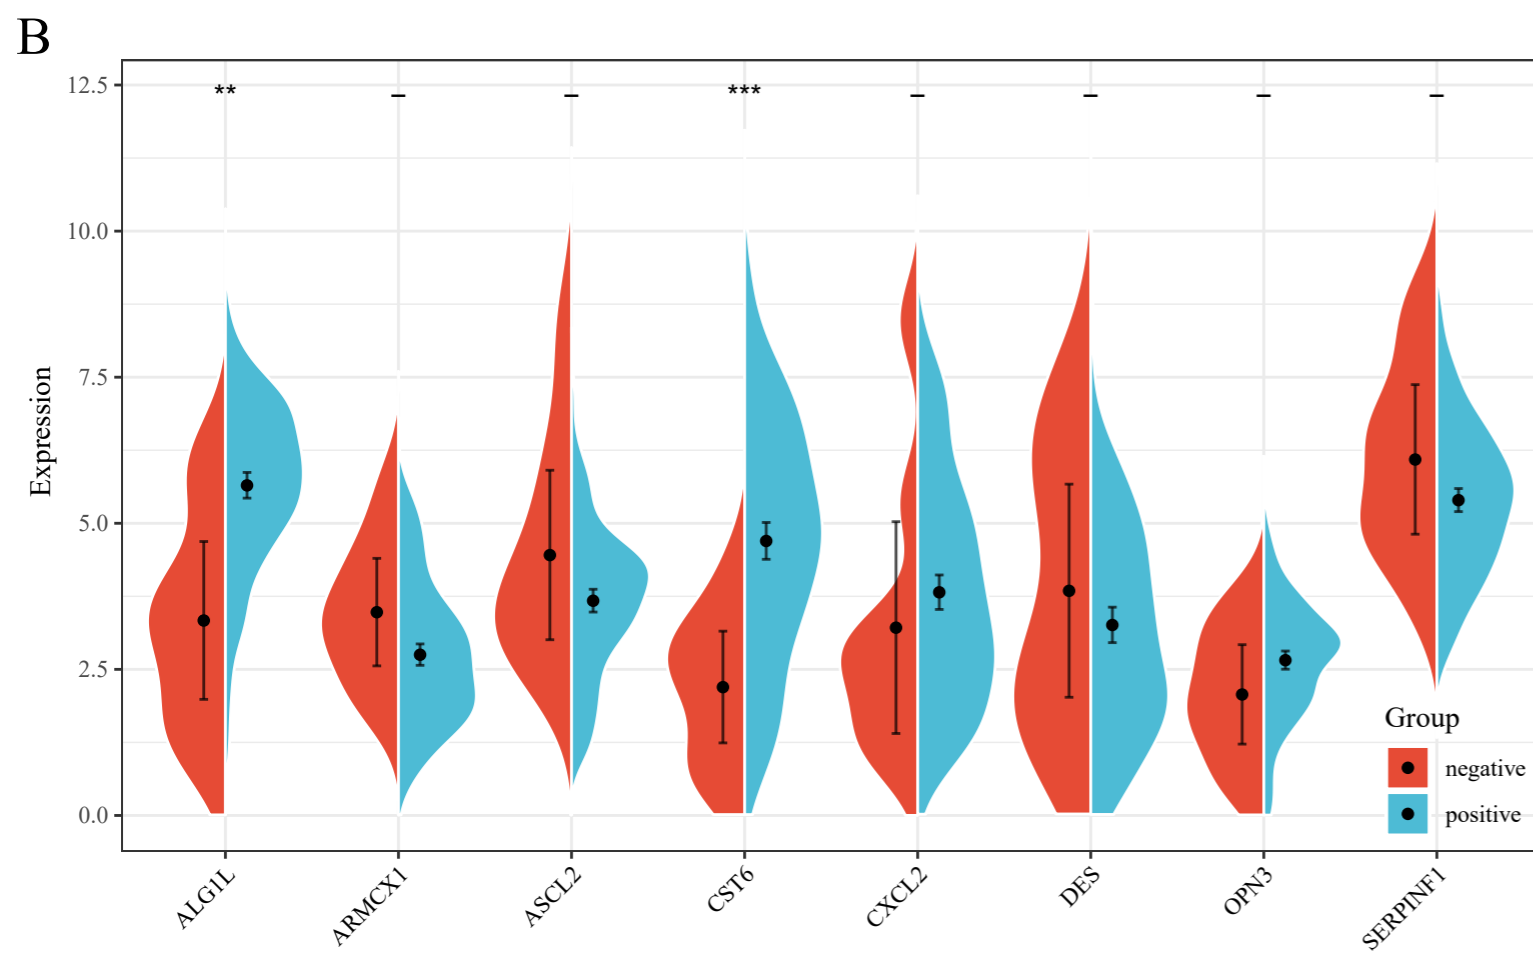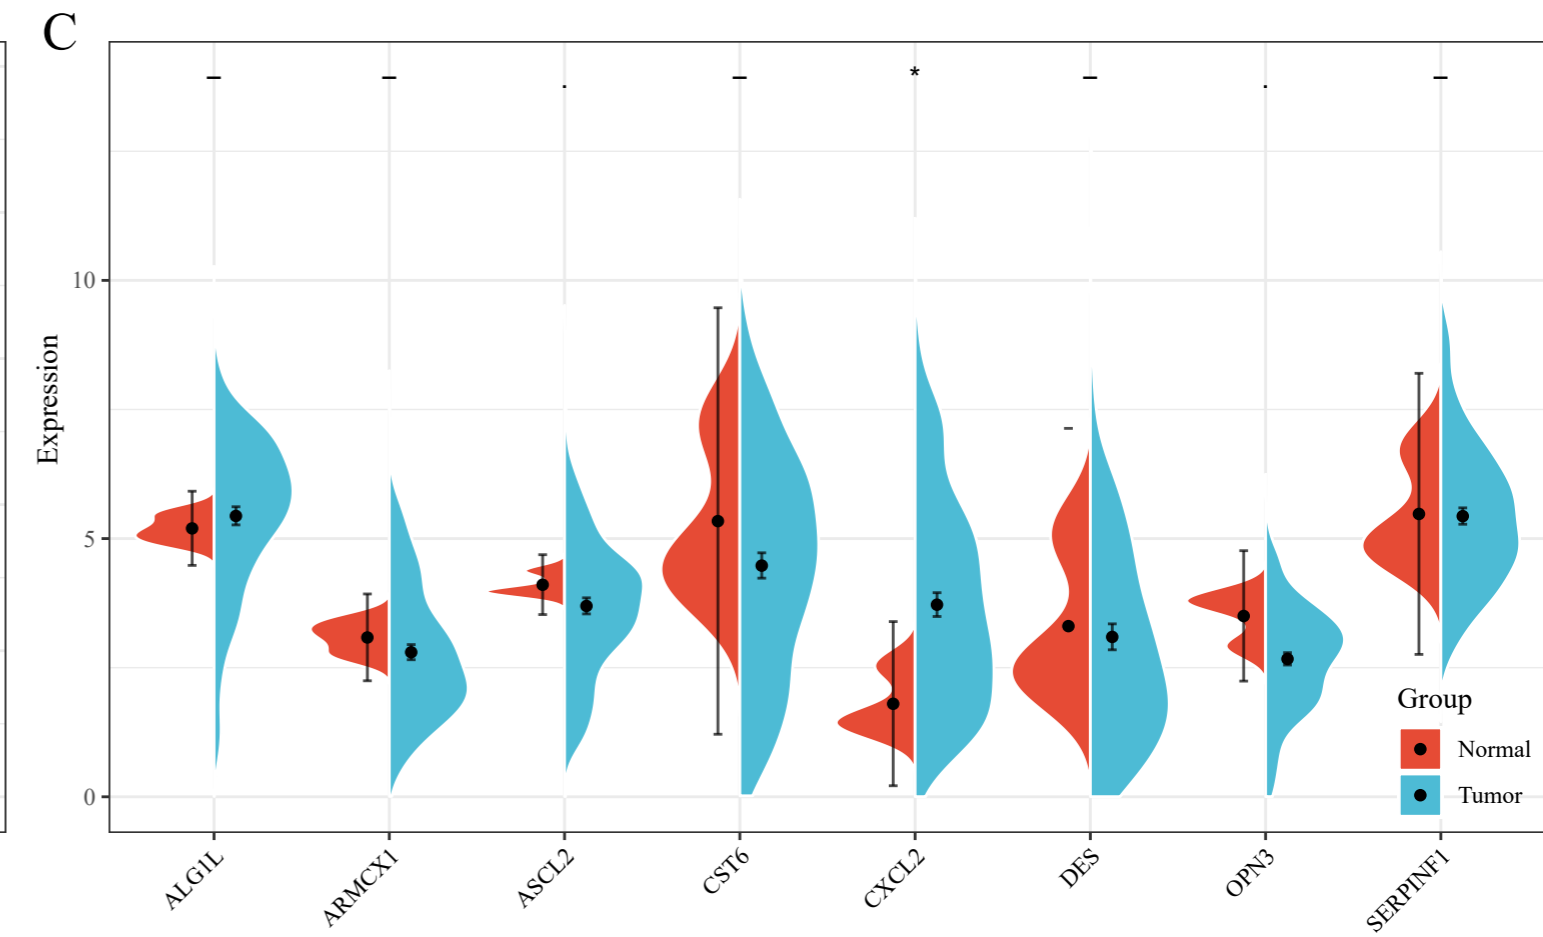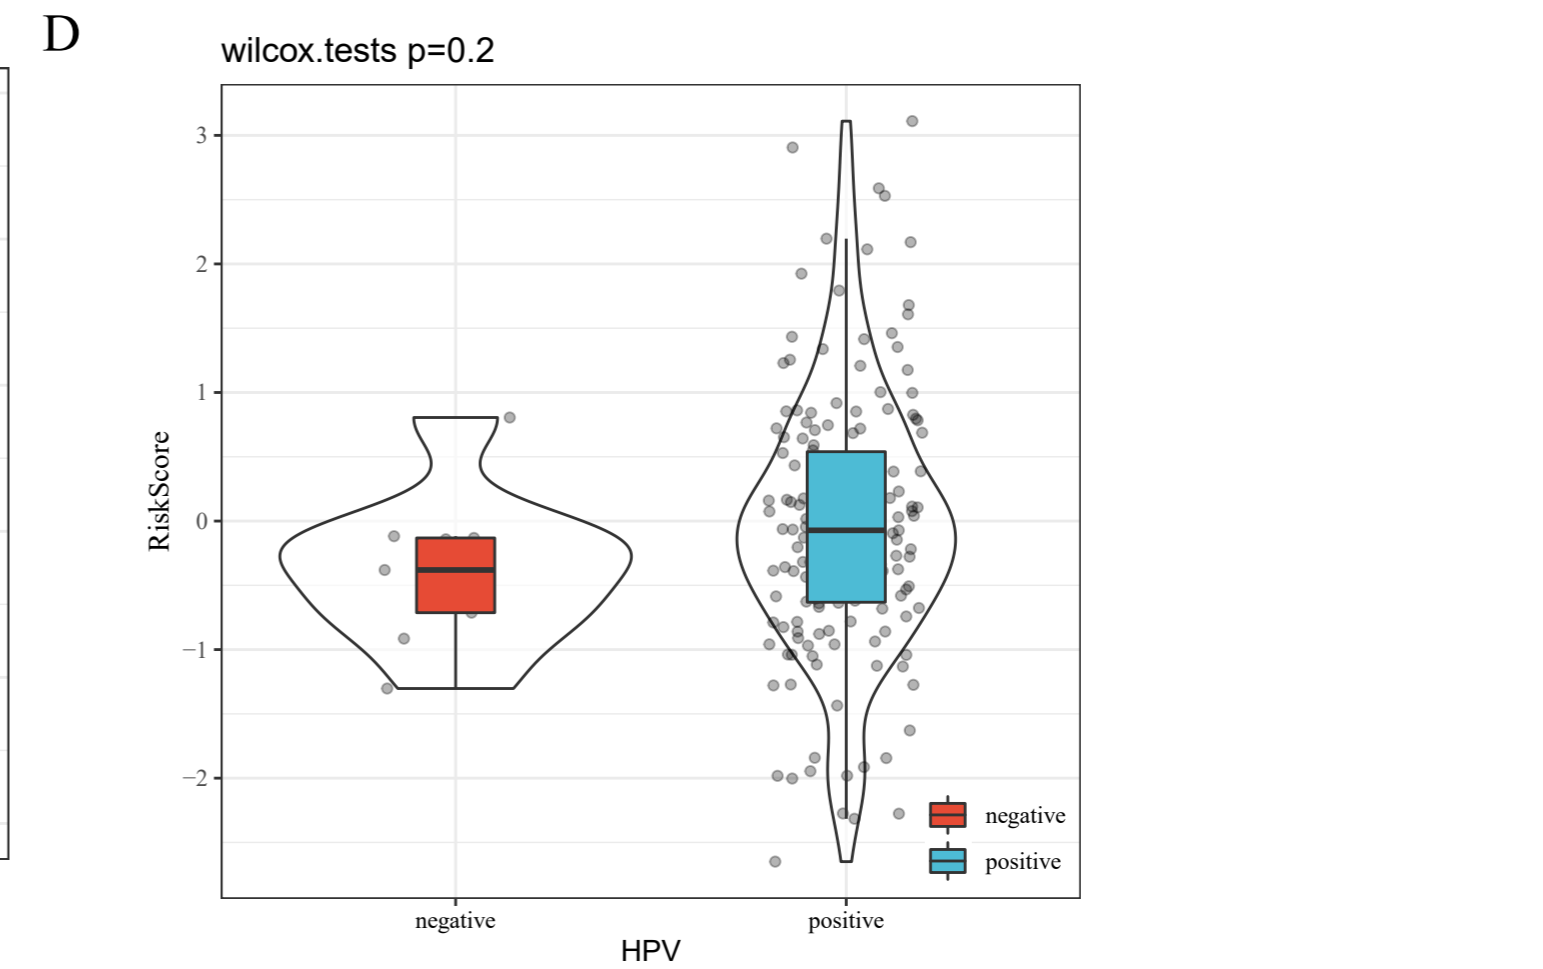

Supplement: f3 [file 1902289.f3.pdf]
